# Supplementary material for: Construction of Enzyme-Responsive Micelles Based on Theranostic Zwitterionic Conjugated Bottlebrush Copolymers with Brush-on-Brush Architecture for Cell Imaging and Anticancer Drug Delivery
Source: MDPI journal article supplement (doi:10.3390/molecules27093016), 2022-05-07
Supplement: s1 [file s1]

## *Supporting Information*

# **Construction of Enzyme-Responsive Micelles Based on Theranostic Zwitterionic Conjugated Bottlebrush Copolymers with Brush-on-Brush Architecture for Cell Imaging and Anticancer Drug Delivery**

Fangjun Liu <sup>2</sup>, Dun Wang <sup>1</sup>, Jiaqi Wang <sup>1</sup>, Liwei Ma <sup>2</sup>, Cuiyun Yu <sup>1,\*</sup> and Hua Wei <sup>1,2,\*</sup>

<sup>1</sup> Hunan Province Cooperative Innovation Center for Molecular Target New Drug Study & Department of Pharmacy and Pharmacology, University of South China, Hengyang 421001, China; 20202012110818@stu.usc.edu.cn (D.W.); jiaqi wang@stu.usc.edu.cn (J.W.)

<sup>2</sup> State Key Laboratory of Applied Organic Chemistry, Key Laboratory of Nonferrous Metal Chemistry and Resources Utilization of Gansu Province, College of Chemistry and Chemical Engineering, Lanzhou University, Lanzhou, 730000, China; liufj18@lzu.edu.cn (F.L.); malw@lzu.edu.cn (L.M.)

\* Correspondance: yucuiyunusc@hotmail.com (C.Y.); weih@usc.edu.cn (H.W.)

## Captions of Figures and Table

**Figure S1.**  $^1\text{H}$  NMR spectra of PFONPN-*g*-N<sub>3</sub> in CDCl<sub>3</sub>.

**Figure S2.**  $^1\text{H}$  NMR spectra of alkyne-PHEMA, PFONPN-*g*-PHEMA and PFONPN-*g*-(PHEMA-*g*-NH<sub>2</sub>) in DMSO-*d*<sub>6</sub>.

**Table S1.** Experimental details for synthesis of polymer brushes

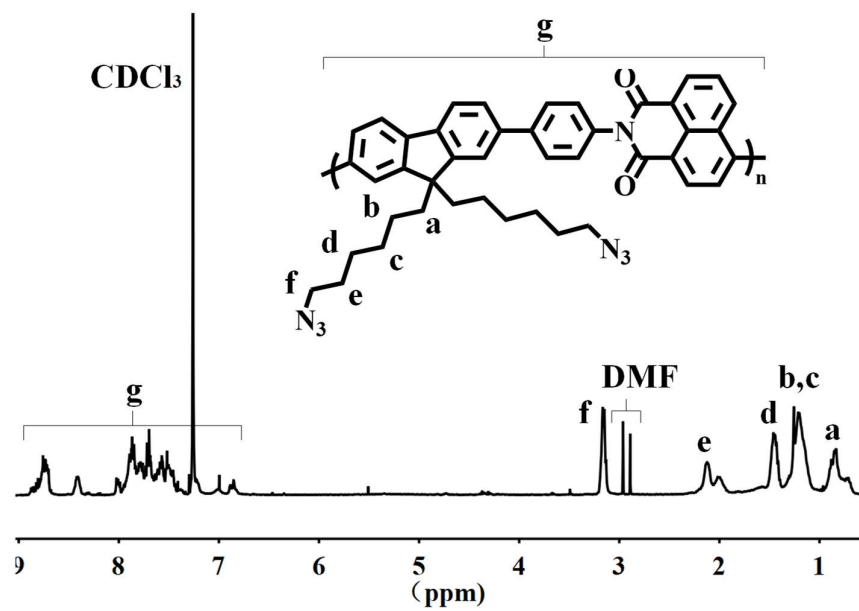

**Figure S1.** <sup>1</sup>H NMR spectra of PFONPN-g-N<sub>3</sub> in CDCl<sub>3</sub>.

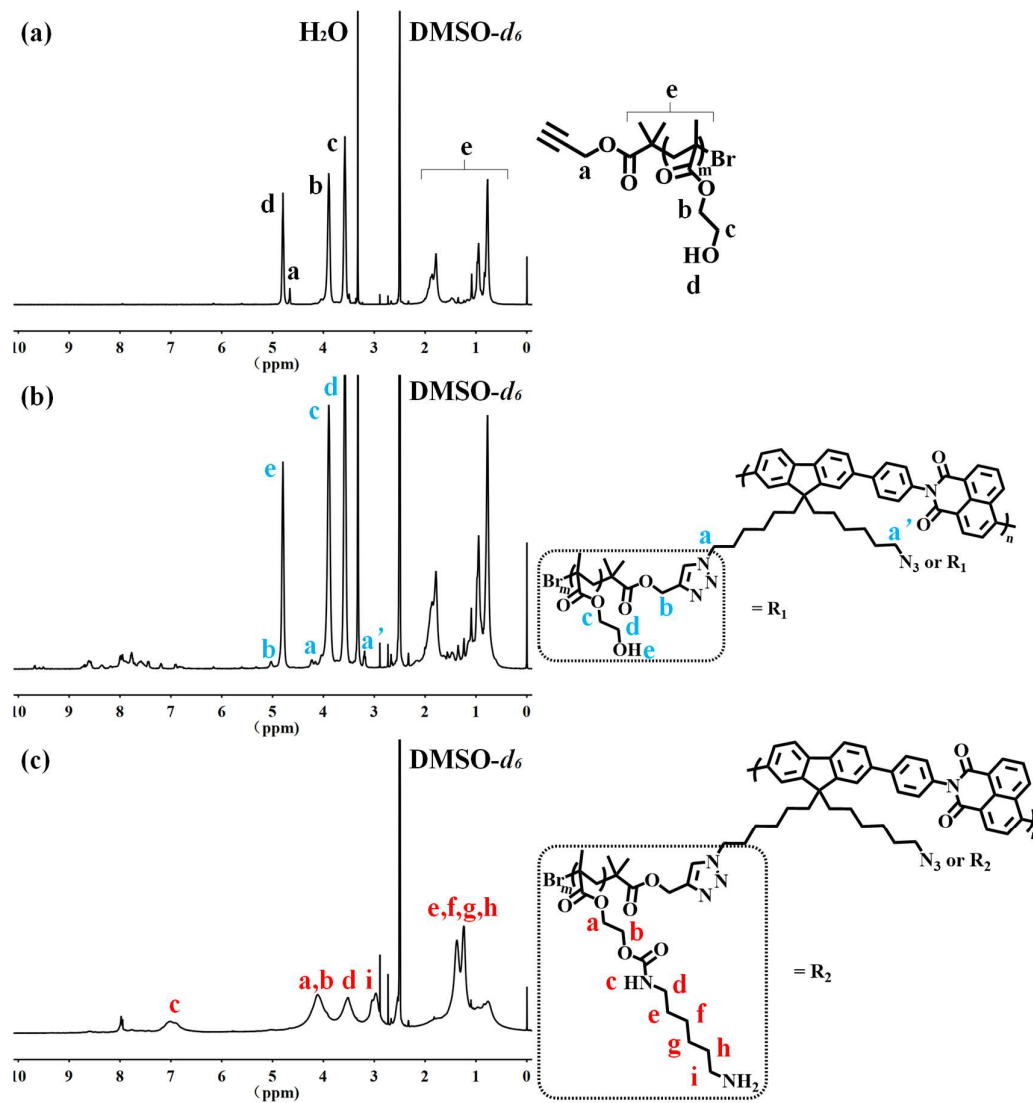

**Figure S2.**  $^1\text{H}$  NMR spectra of alkyne-PHEMA, PFONPN-g-PHEMA and PFONPN-g-(PHEMA-g- $\text{NH}_2$ ) in  $\text{DMSO}-d_6$ .

**Table S1.** Experimental details for synthesis of polymer brushes

| Entry          | [monomer]/[initiator]                                                                                 | [monomer] | DMSO:H <sub>2</sub> O | Reaction time |
|----------------|-------------------------------------------------------------------------------------------------------|-----------|-----------------------|---------------|
|                | OEGMA/SBMA/<br>PFONPN <sub>9</sub> -g-(PHEMA <sub>15</sub> -g-(PTyr <sub>16</sub> -Br <sub>2</sub> )) | [M]       | /mL                   | / h           |
| P <sub>1</sub> | 30:0:1                                                                                                | 0.06      | 10:0                  | 1             |
| P <sub>2</sub> | 15:15:1                                                                                               | 0.05      | 10:1                  | 1             |
| P <sub>3</sub> | 60:0:1                                                                                                | 0.12      | 10:0                  | 1             |
| P <sub>4</sub> | 30:30:1                                                                                               | 0.11      | 10:1                  | 1             |
| P <sub>5</sub> | 70:30:1                                                                                               | 0.18      | 10:1                  | 1             |
